# Supplementary material
Source: PubMed Central journal article supplement (PMC2787134)
Supplement: 0911580106_0911580106SI.pdf [file 0911580106_0911580106SI.pdf]

# Supporting Information

Greenbaum et al. 10.1073/pnas.0911580106

## SI Methods

**Querying for Epitopes with Human Relevance in the IEDB.** Human-relevant influenza A epitopes were retrieved from the IEDB and stored in a local database. For T-cell epitopes with nested sequences, the optimal epitope(s) were chosen manually by comparing the assay descriptions associated with each epitope in the IEDB to identify the peptide with the most frequent responses or to choose multiple peptides if the epitopes were restricted by different MHC molecules. For linear B-cell epitopes with nested sequences, the shortest sequence  $> = 7$  residues was chosen as the representative. For discontinuous epitopes no removal of nested sequences was performed.

The following query parameters (in boldface type) were used to extract epitopes with human relevance from the IEDB:

**Epitope source organism = influenza A.** We consider epitopes that were derived from any influenza A strain.

**B-cell assay or (T-cell assay AND (host = human OR restricting MHC = human)).** We limit ourselves to epitopes characterized in experiments that demonstrate the presence of adaptive immune receptors (antibody/BCR or TCR) that recognize the epitope. For TCR recognition, the epitopes are presented by MHC molecules. As these molecules are highly divergent in different species, we limit T-cell epitopes to those identified in the presence of human MHC molecules.

**Positive Measurement.** The outcome of the experiment has to be reported as a positive response against the epitope. We make no attempt to enforce a common set of criteria for defining immunogenicity and protective efficacy, because widely divergent methodologies were used by different laboratories to measure immune responses. Rather, we record, for each epitope the specific assay category and conditions used, and conform to the criteria for defining positive and negative measurements as reported by the authors themselves in each published article.

**Exclude Antigen = Epitope AND Immunogen = Epitope.** We excluded epitopes that were defined solely by their use as both immunogen (to induce the responses) and as antigen (to measure the response). In such experiments, it is not possible to evaluate the relevance of the induced response for antiviral immunity, as the structural context of the epitope is missing. We considered only those epitopes shown to be recognized by Abs or T Cell Receptors (TCRs) in the context of the whole influenza virus or proteins.

**Exclude small sequences. Linear sequences of  $< 7$  residues and discontinuous sequences  $< 3$  residues.** These constitute partial epitope sequences and will be discarded, as their conservation cannot be accurately determined.

**Querying for Epitopes Conserved in Circulating H1N1.** The epitopes in the human-relevant set described above were searched against H3N2 and H1N1 sequences from circulating strains between 1988 and 2008 epitopes that were 100% conserved in 30% or more of the strains of any given year were kept in the set. This 30% frequency requirement was implemented to prevent the possible inclusion of rare H3N2 and H1N1 isolates. The conservation of discontinuous sequences was determined in a two-step process. First, a regular expression was created to represent the discontinuous epitope residues and the spacing between them. This was matched against the query sequence. If a match was found, the corresponding linear sequence that covers the epitope was extracted from the epitope source sequence and BLASTed against the query sequence. If the match occurred in the homologous region it was considered conserved.

**Query Parameters for Influenza Sequences.** The following query parameters were set:

Virus Species = Influenza A AND (Subtype = H1N1 OR Subtype = H3N2).

Host = Human

Year FROM 1979 TO 2008

Whole genome only

Swine flu sequences were obtained from two sources. The NCBI the NCBI Influenza Viral resource was queried for:

Virus Species = Influenza A AND Subtype = H1N1

Host = Human

Year 2009

**Homology Modeling, Image Generation, and ASA Calculation.** The homology model for Fig. 1 was generated using the SWISS-MODEL homology-modeling server (1). All six individual chains of the 1RUY PDB structure were modeled separately against the representative swine influenza HA sequence (ACP41934.1). The 1RUY structure was selected for modeling by BLASTing the ACP41934.1 sequence against the PDB (2), using the "Advanced Search" option on the PDB website. This structure is the best BLAST hit that does not include a synthetic construct. The chains were consolidated into one PDB file using UCSF Chimera (3). Coordinates of the trimer-fused hemagglutinin (PDB ID: 1HA0) were obtained from the PQS service (4) and the epitope was mapped onto the protein using the IEDB homology mapping tool (5). The images were produced using the WebLabViewer software (Accelrys Inc.). Residue surface accessibilities were calculated using NACCESS (6).

1. Schwede T, Kopp J, Guex N, Peitsch MC (2003) SWISS-MODEL: An automated protein homology-modeling server. *Nucleic Acids Res* 31:3381–3385.
2. Berman HM, et al. (2000) The Protein Data Bank. *Nucleic Acids Res* 28:235–242.
3. Pettersen EF, et al. (2004) UCSF Chimera—a visualization system for exploratory research and analysis. *J Comput Chem* 25:1605–1612.
4. Henrick K, Thornton JM (1998) PQS: A protein quaternary structure file server. *Trends Biochem Sci* 23:358–361.

5. Zhang Q, et al. (2008) Immune epitope database analysis resource (IEDB-AR). *Nucleic Acids Res* 36(Web Server issue):W513–W518.
6. Hubbard S, JM T (1993) NACCESS (Department of Biochemistry and Molecular Biology, University College London).

**Table S1. Epitope sequences conserved in swine-origin H1N1 influenza virus (S-OIV)**

| IEDB ID | Protein | Sequence                                    | Epitope category |
|---------|---------|---------------------------------------------|------------------|
| 20836   | HA      | GLFGAIAGF                                   | B-cell linear    |
| 37043   | M1      | LKTRPILSPLTKGILGFVFTLTVPSERGLQRRRFVQNALNGND | B-cell linear    |
| 97650   | M2      | SLLTEVET                                    | B-cell linear    |
| 15381   | NP      | FDERRNKYLEEHPSAGKDPKKTGGPI                  | B-cell linear    |
| 17539   | NP      | FQTAAQR                                     | B-cell linear    |
| 45359   | NP      | NPGNAEIEDLIFLAR                             | B-cell linear    |
| 67436   | NP      | TYQRTRALV                                   | B-cell linear    |
| 97236   | PB1     | DAVATTHSWIPKRNRSIL                          | B-cell linear    |
| 20837   | HA      | GLFGAIAGFI                                  | T-cell class I   |
| 97183   | M1      | AGKNTDLEALMEWLKTR                           | T-cell class I   |
| 27350   | M1      | ILSPLTKGIL                                  | T-cell class I   |
| 20356   | M1      | GILGFVFTLTV                                 | T-cell class I   |
| 54953   | M1      | RMVLAATTAK                                  | T-cell class I   |
| 4349    | M1      | ASCMGLIY                                    | T-cell class I   |
| 33844   | M1      | KTRPILSPLTK                                 | T-cell class I   |
| 97506   | M1      | MSLLTEVETYVLSII                             | T-cell class I   |
| 51249   | M1      | QKRMGVQMQRFK                                | T-cell class I   |
| 59323   | M1      | SLLTEVETYVL                                 | T-cell class I   |
| 28309   | M1      | IRHENRMVL                                   | T-cell class I   |
| 53918   | M1      | RGLQRRRFVQNALNGNG                           | T-cell class I   |
| 20354   | M1      | GILGFVFTL                                   | T-cell class I   |
| 58567   | M1      | SIIPSGPLK                                   | T-cell class I   |
| 62486   | NA      | SWPDGAELPF                                  | T-cell class I   |
| 97772   | NP      | YERMCNILKG                                  | T-cell class I   |
| 97173   | NP      | AEIEDLIFLA                                  | T-cell class I   |
| 60867   | NP      | SRYWAIRTR                                   | T-cell class I   |
| 97614   | NP      | RMVLSAFDER                                  | T-cell class I   |
| 53890   | NP      | RGINDRNFV                                   | T-cell class I   |
| 55738   | NP      | RRSGAAGAAVK                                 | T-cell class I   |
| 35590   | NP      | LELRSRYWAI                                  | T-cell class I   |
| 35589   | NP      | LELRSRYWA                                   | T-cell class I   |
| 97298   | NP      | FEDLRVSSF                                   | T-cell class I   |
| 27283   | NP      | ILRGVVAHK                                   | T-cell class I   |
| 27126   | NP      | ILKGFQTA                                    | T-cell class I   |
| 97178   | NP      | AFDERRNKYLEEHPSAGK                          | T-cell class I   |
| 7136    | NP      | CTELKLSDY                                   | T-cell class I   |
| 13263   | NP      | ELRSRYWAI                                   | T-cell class I   |
| 97583   | NP      | QLVVMACHSAA                                 | T-cell class I   |
| 19312   | NS1     | GEISPLPSL                                   | T-cell class I   |
| 97405   | NS2     | ITFMQALQLL                                  | T-cell class I   |
| 97503   | PA      | MRRNYFTAIEVSHCRATEY                         | T-cell class I   |
| 17119   | PA      | FMYSDFHFI                                   | T-cell class I   |
| 1166    | PA      | AESRLLLLI                                   | T-cell class I   |
| 62180   | PA      | SVKEKDMTK                                   | T-cell class I   |
| 97781   | PB1     | YRRPVGISSMVEAMVSR                           | T-cell class I   |
| 42143   | PB1     | MMMGMFNML                                   | T-cell class I   |
| 21574   | PB1     | GPATAQMAL                                   | T-cell class I   |
| 4177    | PB1     | ARLGKGYMF                                   | T-cell class I   |
| 32289   | PB1     | KMARLGKGY                                   | T-cell class I   |
| 10514   | PB1     | DTVNRTHQY                                   | T-cell class I   |
| 70898   | PB1     | VSDGGPNLY                                   | T-cell class I   |
| 97299   | PB1     | FEFTSFFY                                    | T-cell class I   |
| 97693   | PB1     | TLARSICEK                                   | T-cell class I   |
| 97314   | PB1     | FVANFSMEL                                   | T-cell class I   |
| 65880   | PB1     | TQIQTRRSF                                   | T-cell class I   |
| 16681   | PB1     | FLKDVMESE                                   | T-cell class I   |
| 6174    | PB1     | CEKLEQSG                                    | T-cell class I   |
| 17780   | PB1     | FSMELPSFGV                                  | T-cell class I   |
| 97309   | PB1     | FNMLSTVLGV                                  | T-cell class I   |
| 97682   | PB1     | TFPYTGDDPPYSHGTGTGY                         | T-cell class I   |
| 63635   | PB1     | TFEFTSFFY                                   | T-cell class I   |
| 97779   | PB2     | YMLERELVRKTRFLPVA                           | T-cell class I   |
| 95905   | HA      | TGMVDGWYGYHHQNEQGS                          | T-cell class II  |
| 96007   | HA      | WTYNAELLVLENER'TLD                          | T-cell class II  |

| IEDB ID | Protein | Sequence              | Epitope category |
|---------|---------|-----------------------|------------------|
| 95623   | HA      | NKVNSVIEKMNTQFTAVG    | T-cell class II  |
| 97482   | M1      | LTKGILGFVFTLTVPSER    | T-cell class II  |
| 97613   | M1      | RMVLASTTAKAMEQM       | T-cell class II  |
| 97403   | M1      | IRHENRMVLASTTAKAM     | T-cell class II  |
| 97740   | M1      | VLASTTAKAMEQMAGSSEQA  | T-cell class II  |
| 67496   | M1      | TYVLSIIPSGPLKAEIAQRL  | T-cell class II  |
| 21087   | M1      | GLQRRRFVQNALNGNDPNN   | T-cell class II  |
| 65112   | M1      | TLTVPSERGLQRRRFVQNAL  | T-cell class II  |
| 37217   | M1      | LLENLQAYQKRMGVQMQRFK  | T-cell class II  |
| 97418   | M1      | KGILGFVFTLTVPSE       | T-cell class II  |
| 65389   | M1      | TNPLIRHENRMVLASTTAKA  | T-cell class II  |
| 97730   | M1      | VFTLTVPSERGLQRRRFV    | T-cell class II  |
| 2754    | M1      | ALMEWLKTRPILSPLTKGIL  | T-cell class II  |
| 1579    | M1      | AGKNTDLEALMEWLKTRPIL  | T-cell class II  |
| 97280   | M1      | ERGLQRRRFVQNALNGNG    | T-cell class II  |
| 32182   | NP      | KLSTRGVQIASNEN        | T-cell class II  |
| 97448   | NP      | LILRGVAHKSLPACVY      | T-cell class II  |
| 45297   | NP      | NPAHKSQLVWMACHSAAFED  | T-cell class II  |
| 97411   | NP      | KATNPVPSFDMSEGSY      | T-cell class II  |
| 97487   | NP      | LVWMACHSAAFEDLR       | T-cell class II  |
| 14070   | NP      | ERRNKYLEEHPHSGKDPKKT  | T-cell class II  |
| 41793   | NP      | MIWHSNLNDATYQRTRALVR  | T-cell class II  |
| 97637   | NP      | SFDMSEGSYFFGDNA       | T-cell class II  |
| 49220   | NP      | PRMCSLMQGSTLPRRSGAAG  | T-cell class II  |
| 70712   | NP      | VRESRNPNGAEIEDLIPLARS | T-cell class II  |
| 97306   | NP      | FLARSALILRGVAHK       | T-cell class II  |
| 97416   | NP      | KFQTAAQRAMMDQVRESR    | T-cell class II  |
| 9745    | NP      | DPRMCSLMQGSTLP        | T-cell class II  |
| 97609   | NP      | RMCNLLKGFQTAAQRAM     | T-cell class II  |
| 67439   | NP      | TYQRTRALVRTGMDP       | T-cell class II  |
| 36692   | NP      | LIRMIKRGINDRNFWRGENG  | T-cell class II  |
| 7655    | NP      | DATYQRTRALVRTGMDPRMC  | T-cell class II  |
| 38689   | NP      | LPRRSGAAGAAVKG        | T-cell class II  |
| 97361   | NP      | GQISVQPTFSVQRNLPF     | T-cell class II  |
| 97269   | NP      | ELIRMIKRGINDRNFWR     | T-cell class II  |
| 36863   | NP      | LKGFQTAAQRAMMDQVRES   | T-cell class II  |
| 10014   | NS1     | DRLRRDQKS             | T-cell class II  |
| 97623   | PA      | RSKFLMDALKLSIE        | T-cell class II  |
| 97701   | PB1     | TNTEGAPQLNPIDGPL      | T-cell class II  |
| 97354   | PB1     | GMFNMLSTVLGVSI LNL    | T-cell class II  |
| 97655   | PB1     | SPGMMGMFNMLSTV        | T-cell class II  |
| 97392   | PB1     | IFENSCELTMEVVQQTRV    | T-cell class II  |
| 97389   | PB1     | HRGDTQIQTRRSFELKKL    | T-cell class II  |
| 97559   | PB1     | PQLNPIDGPLPEDNEPSGY   | T-cell class II  |
| 97228   | PB1     | CKLVGINMSKKKSYINK     | T-cell class II  |
| 97611   | PB1     | RMFLAMITYITRNQPEWF    | T-cell class II  |
| 97237   | PB1     | DCVLEAMAFLEESHPIGIF   | T-cell class II  |
| 97747   | PB1     | VNRTHQYSEKWKWTNTE     | T-cell class II  |
| 97610   | PB1     | RMFLAMITYITRNQP       | T-cell class II  |
| 97353   | PB1     | GLPVGNEKKAKLANVVR     | T-cell class II  |
| 97489   | PB1     | MAFLEESHPIGIFENS      | T-cell class II  |
| 97713   | PB1     | TVLVGVSILNLGQKKYTK    | T-cell class II  |
| 97704   | PB1     | TQGRQTYDWTLNRNQPAA    | T-cell class II  |
| 97501   | PB1     | MMGMFNMLSTVLGVSI      | T-cell class II  |
| 97519   | PB2     | NFVNRRANQRNLNPMHQLLR  | T-cell class II  |

**Table S2. Peripheral blood mononuclear cell (PBMC) donor information**

| ID    | Sex | Age |
|-------|-----|-----|
| ID104 | M   | 35  |
| ID110 | M   | 41  |
| ID111 | M   | 41  |
| ID113 | M   | 27  |
| ID114 | M   | 26  |
| ID115 | M   | 27  |
| ID117 | M   | 28  |
| ID130 | M   | 36  |
| ID132 | F   | 62  |
| ID140 | M   | 34  |
| BC-4  | N/A | N/A |
| BC-11 | N/A | N/A |
| BC-12 | N/A | N/A |
| BC-15 | N/A | N/A |
| BC-17 | N/A | N/A |
| BC-19 | N/A | N/A |
| BC-24 | N/A | N/A |
| BC-34 | N/A | N/A |
| BC-37 | N/A | N/A |
| BC-40 | N/A | N/A |

F, female; M, male; N/A, not available. Sex and age of the PBMC donors is listed where available.

**Table S3. All H1N1 isolates used in the analysis**

| Database | Isolate                                                | N   |
|----------|--------------------------------------------------------|-----|
| NCBI     | Influenza A virus [A/Auckland/1/2009(H1N1)]            | 3   |
| NCBI     | Influenza A virus [A/Auckland/2/2009(H1N1)]            | 2   |
| NCBI     | Influenza A virus [A/Auckland/3/2009(H1N1)]            | 3   |
| NCBI     | Influenza A virus [A/California/04/2009(H1N1)]         | 18* |
| NCBI     | Influenza A virus [A/California/05/2009(H1N1)]         | 8   |
| NCBI     | Influenza A virus [A/California/06/2009(H1N1)]         | 10* |
| NCBI     | Influenza A virus [A/California/07/2009(H1N1)]         | 23* |
| NCBI     | Influenza A virus [A/California/08/2009(H1N1)]         | 13  |
| NCBI     | Influenza A virus [A/California/09/2009(H1N1)]         | 4   |
| NCBI     | Influenza A virus [A/California/10/2009(H1N1)]         | 3   |
| NCBI     | Influenza A virus [A/Denmark/513/2009(H1N1)]           | 6   |
| NCBI     | Influenza A virus [A/Italy/01/2009(H1N1)]              | 1   |
| NCBI     | Influenza A virus [A/Italy/02/2009(H1N1)]              | 2   |
| NCBI     | Influenza A virus [A/Kansas/03/2009(H1N1)]             | 1   |
| NCBI     | Influenza A virus [A/Netherlands/602/2009(H1N1)]       | 2   |
| NCBI     | Influenza A virus [A/New York/06/2009(H1N1)]           | 6   |
| NCBI     | Influenza A virus [A/New York/10/2009(H1N1)]           | 9   |
| NCBI     | Influenza A virus [A/New York/11/2009(H1N1)]           | 8   |
| NCBI     | Influenza A virus [A/New York/12/2009(H1N1)]           | 5   |
| NCBI     | Influenza A virus [A/New York/15/2009(H1N1)]           | 7   |
| NCBI     | Influenza A virus [A/New York/18/2009(H1N1)]           | 10* |
| NCBI     | Influenza A virus [A/New York/19/2009(H1N1)]           | 10  |
| NCBI     | Influenza A virus [A/New York/20/2009(H1N1)]           | 2   |
| NCBI     | Influenza A virus [A/New York/23/2009(H1N1)]           | 5   |
| NCBI     | Influenza A virus [A/New York/31/2009(H1N1)]           | 6   |
| NCBI     | Influenza A virus [A/Ohio/07/2009(H1N1)]               | 14  |
| NCBI     | Influenza A virus [A/Regensburg/Germany/01/2009(H1N1)] | 3   |
| NCBI     | Influenza A virus [A/Switzerland/01/2009(H1N1)]        | 1   |
| NCBI     | Influenza A virus [A/Texas/04/2009(H1N1)]              | 20* |
| NCBI     | Influenza A virus [A/Texas/05/2009(H1N1)]              | 15  |
| NCBI     | Influenza A virus [A/Texas/06/2009(H1N1)]              | 7   |
| NCBI     | Influenza A virus [A/Toronto/3141/2009(H1N1)]          | 1   |
| NCBI     | Influenza A virus [A/Toronto/3145/2009(H1N1)]          | 1   |
| NCBI     | Influenza A virus [A/Toronto/3146/2009(H1N1)]          | 1   |
| NCBI     | Influenza A virus [A/Toronto/3170/2009(H1N1)]          | 1   |
| NCBI     | Influenza A virus [A/Toronto/3178/2009(H1N1)]          | 1   |
| NCBI     | Influenza A virus [A/Toronto/3181/2009(H1N1)]          | 1   |
| NCBI     | Influenza A virus [A/Toronto/3184/2009(H1N1)]          | 1   |
| GISAID   | Influenza A/Mexico/4108/2009                           | 14  |
| GISAID   | Influenza A/Mexico/4115/2009                           | 7   |
| GISAID   | Influenza A/Mexico/4482/2009                           | 6   |
| GISAID   | Influenza A/Mexico/4486/2009                           | 12  |
| GISAID   | Influenza A/Mexico/4603/2009                           | 7   |
| GISAID   | Influenza A/Mexico/4604/2009                           | 6   |

NCBI, National Center for Biotechnology Information.

\*Indicates that there were sequences from each of the genome segments, excluding PB1-F2.
